# Supplementary material for: H2O2/DEM-Promoted Maft Promoter Demethylation Drives Nrf2/ARE Activation in Zebrafish
Source: MDPI journal article supplement (doi:10.3390/life12091436), 2022-09-15
Supplement: s1 [file s1]

# H<sub>2</sub>O<sub>2</sub>/DEM-promoted *maft* promoter demethylation drives Nrf2/ARE activation in zebrafish

Ce Chen<sup>1#</sup>, Mingyue He<sup>1#</sup>, Xueting Li<sup>1#</sup>, Lidong Yu<sup>2</sup>, Yi Liu<sup>1</sup>, Yan Yang<sup>1</sup>, Li Li<sup>1\*</sup>, Jianbo Jia<sup>3\*</sup>, Bingsheng Li<sup>4</sup>

- <sup>1</sup> School of Life Science and Technology, Harbin Institute of Technology, Harbin 150080, P.R. China  
<sup>2</sup> School of Physics, Harbin Institute of Technology, Harbin 150080, P.R. China  
<sup>3</sup> School of Biotechnology and Health Sciences, Wuyi University, Jiangmen 529020, P.R. China  
<sup>4</sup> Key Laboratory of UV Light Emitting Materials and Technology of Ministry of Education, Northeast Normal University, Changchun 130024, P. R. China  
# These authors contributed equally.  
\* Correspondence: lilili@hit.edu.cn (L.L.); jbjia@wyu.edu.cn (J.J.)

**Table S1.** PCR Oligonucleotide primers.

| Genes          | Forward Primer sequences            | Reverse Primer sequences          |
|----------------|-------------------------------------|-----------------------------------|
| <i>keap1a</i>  | 5'- GTGTGGAGTGCTACTGTCCC -3'        | 5'- TCCTCCTCTGGCAGGATACC -3'      |
| <i>Keap1b</i>  | 5'- ATCGAGGGGATACACCCCAA -3'        | 5'- AGTGCTCCACCAGGAAATC -3'       |
| <i>nrf2a</i>   | 5'- GAGCGGGAGAAATCACACAGAATG -3'    | 5'- CAGGAGCTGCATGCACCTCATCG -3'   |
| <i>nrf2b</i>   | 5'- GCCACGTTATGCTGGGTTC -3'         | 5'- CTGCGGACAACGATAGCAGA -3'      |
| <i>mafK</i>    | 5'- ACCTGTTGACTCCAGGACACT -3'       | 5'- AAATCTGTCTTGTGAACGCGG -3'     |
| <i>maf1</i>    | 5'- TCATTATAAGGGCGCTGTGGG -3'       | 5'- GACTCGTGCCATTCTCACCT -3'      |
| <i>maf2</i>    | 5'- CGCTCCAAATACGAGGCTCT -3'        | 5'- GGCGTCGGTCTTGGACTTTA -3'      |
| <i>maft</i>    | 5'- GTGTGACACGAAACACCGGA -3'        | 5'- CCCTTTTCACCTTGAGGGCT -3'      |
| <i>gclC</i>    | 5'- AACCGACACCCAAAGATTACAGCACT -3'  | 5'- CCATCATCTCTGGAACACCTCC -3'    |
| <i>gstP1</i>   | 5'- CGACTTGAAAGCCACCTGTGTC -3'      | 5'- CTGTCGTTTTTGCCATATGCAGC -3'   |
| <i>ef1α</i>    | 5'- CCTGGGAGTGAAACGCTGATC -3'       | 5'- CCGATCTTCTTGATGTATGCGCTG -3'  |
| <i>nqo1</i>    | 5'- TTTCGAGAATCCCGAGCACT -3'        | 5'- TCTTCTGCGATCAAGCTGAAAG -3'    |
| <i>sod1</i>    | 5'- CTAGCCCGCTGACATTACATC -3'       | 5'- TTGCCACATAGAAATGCAC -3'       |
| <i>sod2</i>    | 5'- CGCATGTTCCAGACATCTA -3'         | 5'- GAGCGGAAGATTGAGGATTG -3'      |
| <i>dnmt1</i>   | 5'- GGGCTACCACTGCACCTTTG -3'        | 5'- GATGATAGCTCTGCGTCGAGTC -3'    |
| <i>dnmt3a1</i> | 5'- TTTTCGGTTGTTTTTTGTTC -3'        | 5'- CCGTCACCGATCAATAACT -3'       |
| <i>dnmt3a2</i> | 5'- ATGTGAATATTGATGTTTTGGTAGTGT -3' | 5'- AATAAACAACCACATCCAAATTTAA -3' |
| <i>dnmt3b1</i> | 5'- AGTGTGATGATATTATTTATTGTTGTG -3' | 5'- ACATTAACTTCTCTCTCTCAAAATC -3' |
| <i>dnmt3b2</i> | 5'- GTGGATTTTTTATGAATGAAATTA -3'    | 5'- TACACACTCAACAAAACAAAAAC -3'   |
| <i>dnmt3b3</i> | 5'- AGGTGAGAATGTTTCGGC -3'          | 5'- AACGACCCACGAATAACAAT -3'      |
| <i>dnmt3b4</i> | 5'- TTTTGTATATAAAATTTTTTTTGT -3'    | 5'- CCTTCTCTACTACTCAAAACCTC -3'   |

**Table S2.** Methylated PCR primers

| Genes         | Forward Primer sequences           | Reverse Primer sequences         |
|---------------|------------------------------------|----------------------------------|
| <i>keap1a</i> | 5'- TTTTCGGTTTGT TTTTGTTC -3'      | 5'- CCGTCACCGATCAATAACT -3'      |
| <i>nrf2a</i>  | 5'- ATGTGAATATTGATGTTTGGTAGTGT -3' | 5'- AATAACAACCAATTCCAAATTA -3'   |
| <i>nrf2b</i>  | 5'- AGTGTGATGATATTATTATTGTTGTG -3' | 5'- ACATTAATCTTCTCTCTTCAAATC -3' |
| <i>maf2</i>   | 5'- GTGGATTTTATGAATGAAATTA -3'     | 5'- TACACACTCAACAAACAAAAAC -3'   |
| <i>mafK</i>   | 5'- AGGTGAGAATGTTTCGGC -3'         | 5'- AACGACCCACGAATAACAAT -3'     |
| <i>mafI</i>   | 5'- TTTTGTATATAAAATATTTTGTGTT -3'  | 5'- CCTTCTTCTACTACTCCAAACCTC -3' |

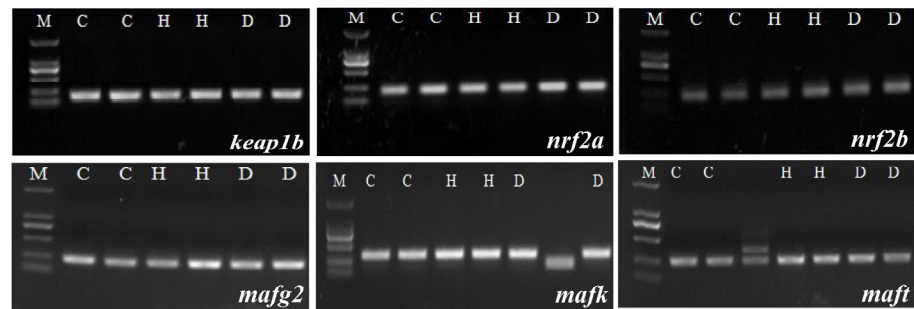

**Figure S1.** Gel electrophoresis of methylated PCR products.

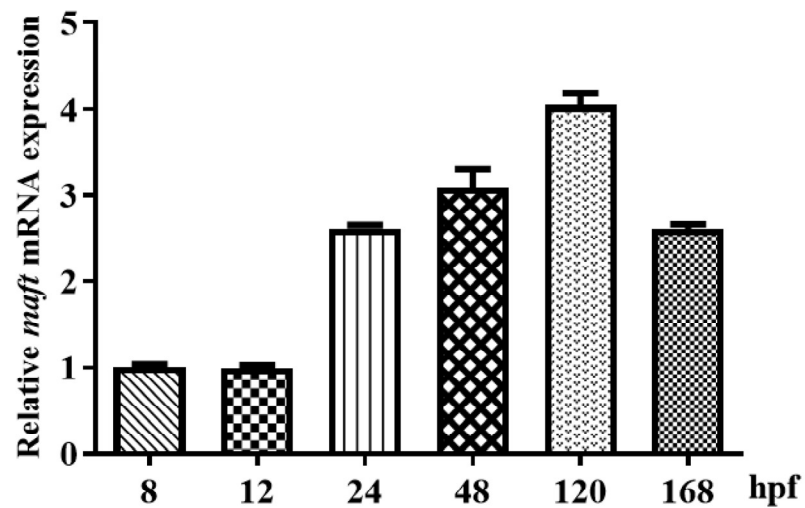

**Figure S2.** The expression of *mafI* in different periods.
